# Supplementary material
Source: ML conference proceedings conference paper supplement (https://openaccess.thecvf.com/content/WACV2021/html/Lin_Two-Hand_Global_3D_WACV_2021_paper.html)
Supplement: Supplementary file 2 [file Lin_Two-Hand_Global_3D_WACV_2021_supplemental.zip]

Archive with 2 entries (2 files):
- Supplementary Document.pdf
- Supplementary Video.mp4
